# Supplementary material for: Development of a Novel UPLC-MS/MS Method for the Simultaneous Determination of 16 Mycotoxins in Different Tea Categories
Source: MDPI journal article supplement (doi:10.3390/toxins14030169), 2022-02-24
Supplement: s1 [file s1]

# Supplementary Materials: Development of a Novel UPLC-MS/MS Method for the Simultaneous Determination of 16 Mycotoxins in Different Tea Categories

Haiyan Zhou, Zheng Yan, Song Yu, Aibo Wu and Na Liu

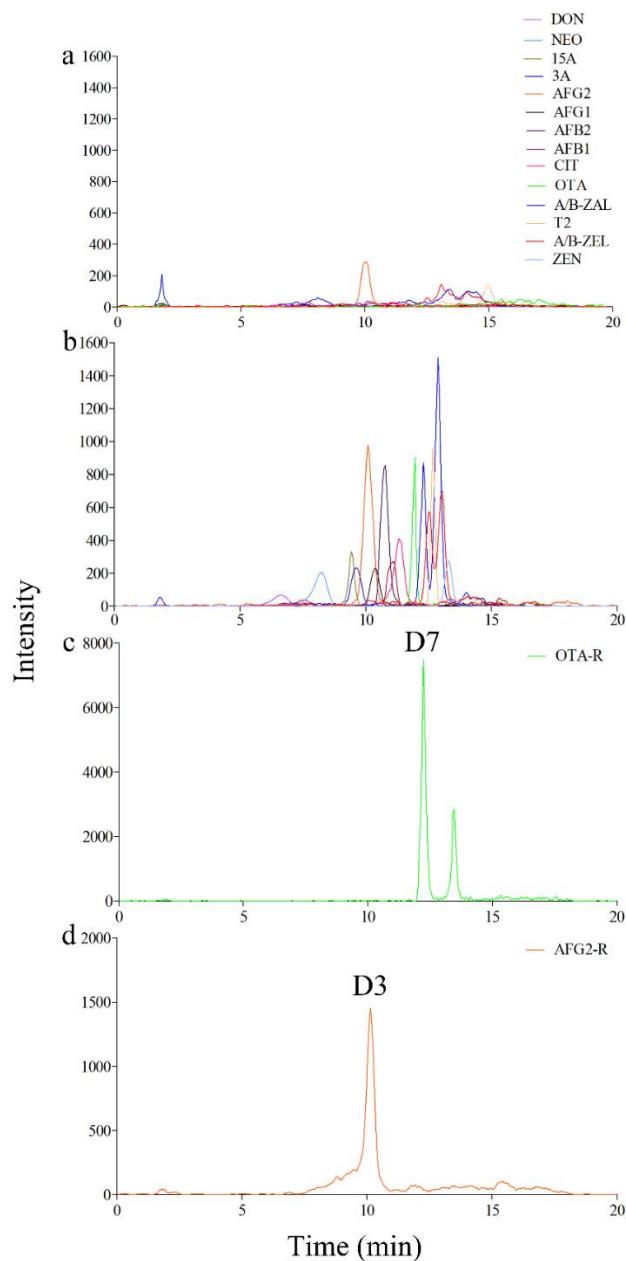

**Figure. S1.** The chromatogram of blank matrix, bank matrix with mycotoxin standard and mycotoxin in real sample application (R): (a) the chromatogram of blank matrix; (b) the chromatogram of bank matrix with 16

mycotoxin standards; (c) the chromatogram of OTA in real sample (D7); (d) the chromatogram of AFG<sub>2</sub> real sample (D3).

**Table S1.** Overview of the methodological characteristics including limits of detection, limits of quantification, spiked concentrations ( $n = 6$ ) for various mycotoxins ( $\mu\text{g}\cdot\text{kg}^{-1}$ ).

| Analytes         | LOD   | LOQ   | Low   | Middle | High    |
|------------------|-------|-------|-------|--------|---------|
| AFB <sub>1</sub> | 0.03  | 0.06  | 0.50  | 2.50   | 10.00   |
| AFB <sub>2</sub> | 0.015 | 0.03  | 0.13  | 0.63   | 2.50    |
| AFG <sub>1</sub> | 0.03  | 0.06  | 0.50  | 2.50   | 10.00   |
| AFG <sub>2</sub> | 0.03  | 0.06  | 0.13  | 0.63   | 2.50    |
| ZEN              | 0.13  | 0.25  | 1.00  | 5.00   | 20.00   |
| $\alpha$ -ZEL    | 0.75  | 1.50  | 3.00  | 15.00  | 60.00   |
| $\beta$ -ZEL     | 0.75  | 1.50  | 3.00  | 15.00  | 60.00   |
| $\alpha$ -ZAL    | 0.75  | 1.50  | 3.00  | 15.00  | 60.00   |
| $\beta$ -ZAL     | 0.75  | 1.50  | 3.00  | 15.00  | 60.00   |
| DON              | 7.50  | 15.00 | 30.00 | 150.00 | 600.00  |
| 15-Ac DON        | 15.00 | 30.00 | 60.00 | 300.00 | 1200.00 |
| 3-Ac DON         | 7.50  | 15.00 | 30.00 | 150.00 | 600.00  |
| OTA              | 0.125 | 0.25  | 3.00  | 15.00  | 60.00   |
| NEO              | 0.75  | 1.50  | 3.00  | 15.00  | 60.00   |
| T-2              | 1.50  | 2.50  | 3.00  | 15.00  | 60.00   |
| CIT              | 0.06  | 0.125 | 10.00 | 50.00  | 200.00  |

**Table S2.** Occurrence and concentration levels of 16 mycotoxins in pu-erh during different production steps ( $\mu\text{g}\cdot\text{kg}^{-1}$ ).

| Analytes         | RM     | HT     | F <sub>1</sub> | F <sub>2</sub> | F <sub>3</sub> | F <sub>4</sub> | F <sub>5</sub> | QD     | BCP   | CP    |
|------------------|--------|--------|----------------|----------------|----------------|----------------|----------------|--------|-------|-------|
| DON              | 175.51 | 183.14 | 226.59         | 0.00           | 0.00           | 0.00           | 0.00           | 0.00   | 0.00  | 0.00  |
| 3-Ac DON         | 0.00   | 0.00   | 0.00           | 0.00           | 0.00           | 0.00           | 0.00           | 0.00   | 0.00  | 0.00  |
| 15-Ac DON        | 40.24  | 0.00   | 557.53         | 229.67         | 246.14         | 174.51         | 0.00           | 150.61 | 63.76 | 0.00  |
| AFB <sub>1</sub> | 0.03   | 0.11   | 0.09           | 0.00           | 0.11           | 0.04           | 0.00           | 0.00   | 0.00  | 0.14  |
| AFB <sub>2</sub> | 0.08   | 0.13   | 0.07           | 0.15           | 0.13           | 0.14           | 0.17           | 0.00   | 0.00  | 0.10  |
| AFG <sub>1</sub> | 0.42   | 0.82   | 3.08           | 1.74           | 1.63           | 1.66           | 1.55           | 4.18   | 1.46  | 0.86  |
| AFG <sub>2</sub> | 9.37   | 12.42  | 9.72           | 14.31          | 10.97          | 10.75          | 10.76          | 5.53   | 4.53  | 11.18 |
| ZEN              | 4.25   | 4.23   | 4.77           | 4.14           | 4.94           | 4.46           | 5.76           | 4.98   | 4.02  | 6.85  |
| $\alpha$ -ZEL    | 21.13  | 4.47   | 10.60          | 7.30           | 6.27           | 7.86           | 7.56           | 6.44   | 6.40  | 7.03  |
| $\beta$ -ZEL     | 49.96  | 70.47  | 74.08          | 66.36          | 62.83          | 59.67          | 59.69          | 56.16  | 52.26 | 72.61 |
| $\alpha$ -ZAL    | 0.00   | 14.08  | 0.00           | 0.00           | 0.00           | 0.00           | 0.00           | 0.00   | 0.00  | 0.00  |
| $\beta$ -ZAL     | 0.00   | 0.00   | 0.00           | 0.00           | 0.00           | 0.00           | 0.00           | 0.00   | 0.00  | 0.00  |
| NEO              | 0.00   | 0.00   | 24.34          | 18.76          | 4.98           | 8.00           | 3.22           | 5.53   | 0.00  | 0.00  |
| OTA              | 0.74   | 0.70   | 0.38           | 0.00           | 0.11           | 0.18           | 0.53           | 0.00   | 0.00  | 0.00  |
| T-2              | 0.00   | 0.00   | 11.28          | 0.00           | 0.00           | 0.00           | 0.00           | 0.00   | 0.00  | 0.00  |
| CIT              | 8.29   | 23.22  | 34.88          | 48.31          | 62.92          | 38.32          | 34.43          | 0.00   | 0.00  | 0.00  |
| AFs              | 9.91   | 13.48  | 12.96          | 16.20          | 12.84          | 12.59          | 12.48          | 9.71   | 5.99  | 12.28 |
| ZENs             | 75.34  | 93.25  | 89.46          | 77.81          | 74.04          | 71.99          | 73.00          | 67.57  | 62.68 | 86.48 |

RM: raw material; HT: humidifying tea; F<sub>1</sub>: first repiling samples; F<sub>2</sub>: second repiling samples; F<sub>3</sub>: third repiling samples; F<sub>4</sub>: fourth repiling samples; F<sub>5</sub>: fifth repiling samples; QD: piling-up samples; BCP: semfinished pu-erh; CP: finished pu-erh. The number of samples in each stage of repiling was three, which are taken from the upper, middle, and lower layer.
